# Supplementary material for: Superior colliculus neurons encode a visual saliency map during free viewing of natural dynamic video
Source: PubMed Central journal article supplement (PMC5286207; doi:10.1038/ncomms14263), 2017-01-24
Supplement: ncomms14263-s1.pdf [file ncomms14263-s1.pdf]

**Supplementary Figures**

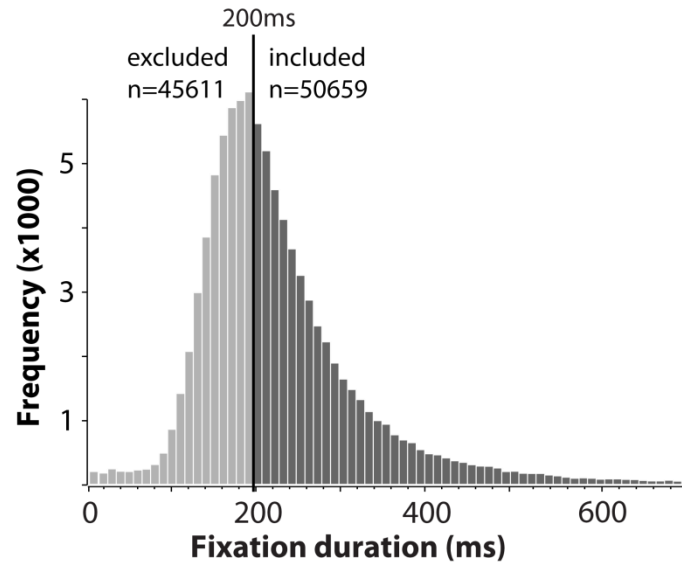

**Supplementary Figure 1:** Total distribution of fixation durations across all recording sessions. Dark bars indicate the fixations whose duration exceeded the 200ms cutoff.

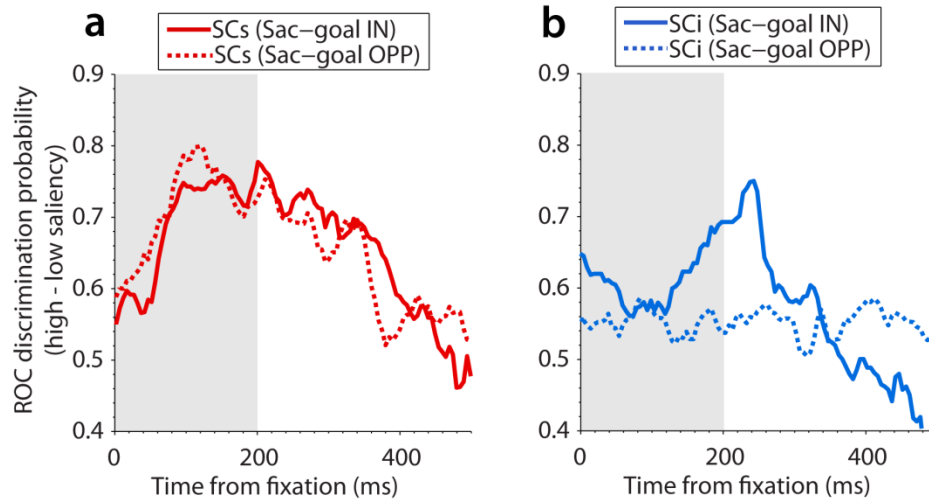

**Supplementary Figure 2. Receiver operating characteristic (ROC) analysis.** We computed the area under the ROC curve at each millisecond, between the high-saliency and low-saliency conditions, across the sample of **(a)** SCs ( $n=34$ ), and **(b)** SCi ( $n=26$ ) neurons, separately for the saccade-goal In (solid traces) and saccade-goal-opposite (dotted traces) conditions. Values greater than 0.5 indicate the neurons' ability to discriminate high from low saliency (i.e., greater firing rate associated with high saliency).

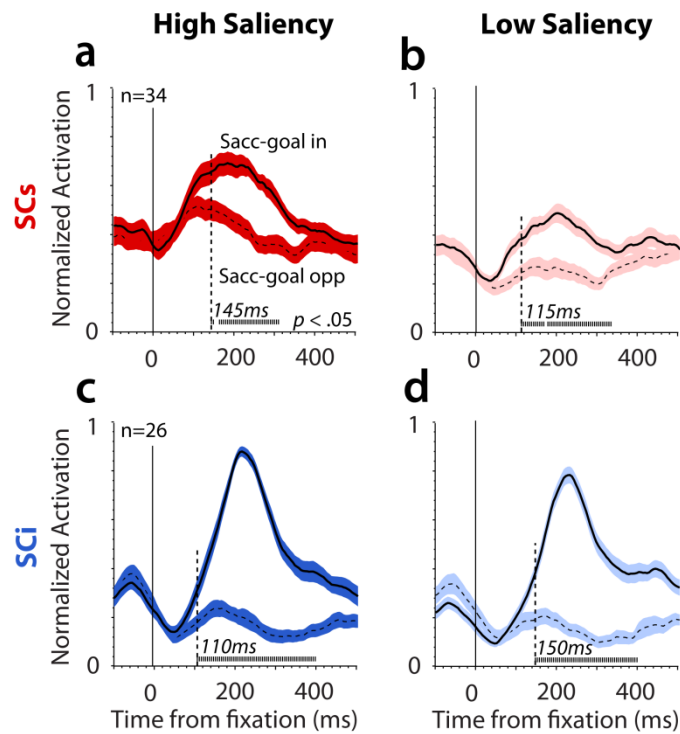

**Supplementary Figure 3. Selection processes during free viewing.** The selection process of SCs and SCi was quantified during free viewing by comparing activation associated with next-saccades directed in (solid lines) versus opposite (dashed lines) the RF. Shading along the response curves represents  $\pm 1$  SEM. Tick marks above the abscissa indicate significant differences between the response curves (running Wilcoxon paired-samples test, Bonferroni-Holm correction). Selection time (the earliest point where the response curves significantly diverged) is indicated by the vertical dotted lines.
